# Supplementary material for: Assessing potential inhibitors of SARS-CoV-2 main protease from available drugs using free energy perturbation simulations
Source: Royal Society of Chemistry journal article supplement (doi:10.1039/d0ra07352k), 2020-01-01
Supplement: d0ra07352k1.pdf [file d0ra07352k1.pdf]

## Supporting Information

# Assessing Potential Inhibitors for SARS-CoV-2 Main Protease from Available Drugs using Free Energy Perturbation Simulations

Son Tung Ngo,<sup>a,b\*</sup> Hung Minh Nguyen,<sup>c,d</sup> Le Thi Thuy Huong,<sup>e,f</sup> Pham Minh Quan,<sup>e,f</sup> Vi Khanh Truong,<sup>g</sup> Nguyen Thanh Tung,<sup>h</sup> Van V. Vu<sup>i\*</sup>

<sup>a</sup>*Laboratory of Theoretical and Computational Biophysics, Ton Duc Thang University, Ho Chi Minh City 700000, Vietnam.*

<sup>b</sup>*Faculty of Applied Sciences, Ton Duc Thang University, Ho Chi Minh City 700000, Vietnam*

<sup>c</sup>*Center for Molecular Biology, Institute of Research and Development, Duy Tan University, Da Nang, 550000, Vietnam*

<sup>d</sup>*Faculty of Pharmacy, Duy Tan University, Da Nang, 550000, Vietnam*

<sup>e</sup>*Institute of Natural Products Chemistry, Vietnam Academy of Science and Technology, Hanoi 100000, Vietnam*

<sup>f</sup>*Graduate University of Science and Technology, Vietnam Academy of Science and Technology, Hanoi 100000, Vietnam*

<sup>g</sup>*School of Science, RMIT University, GPO Box 2476, Melbourne 3001, Australia*

<sup>h</sup>*Institute of Materials Science, Vietnam Academy of Science and Technology, Hanoi 100000, Vietnam*  
*iNTT Hi-Tech Institute, Nguyen Tat Thanh University, Ho Chi Minh City 700000, Vietnam*

\*Email: [ngosontung@tdtu.edu.vn](mailto:ngosontung@tdtu.edu.vn); [vanvu@ntt.edu.vn](mailto:vanvu@ntt.edu.vn)

**Table S1.** 2D docking conformation between the top 33 ZINC15 compounds and SARS-CoV-2 Mpro.

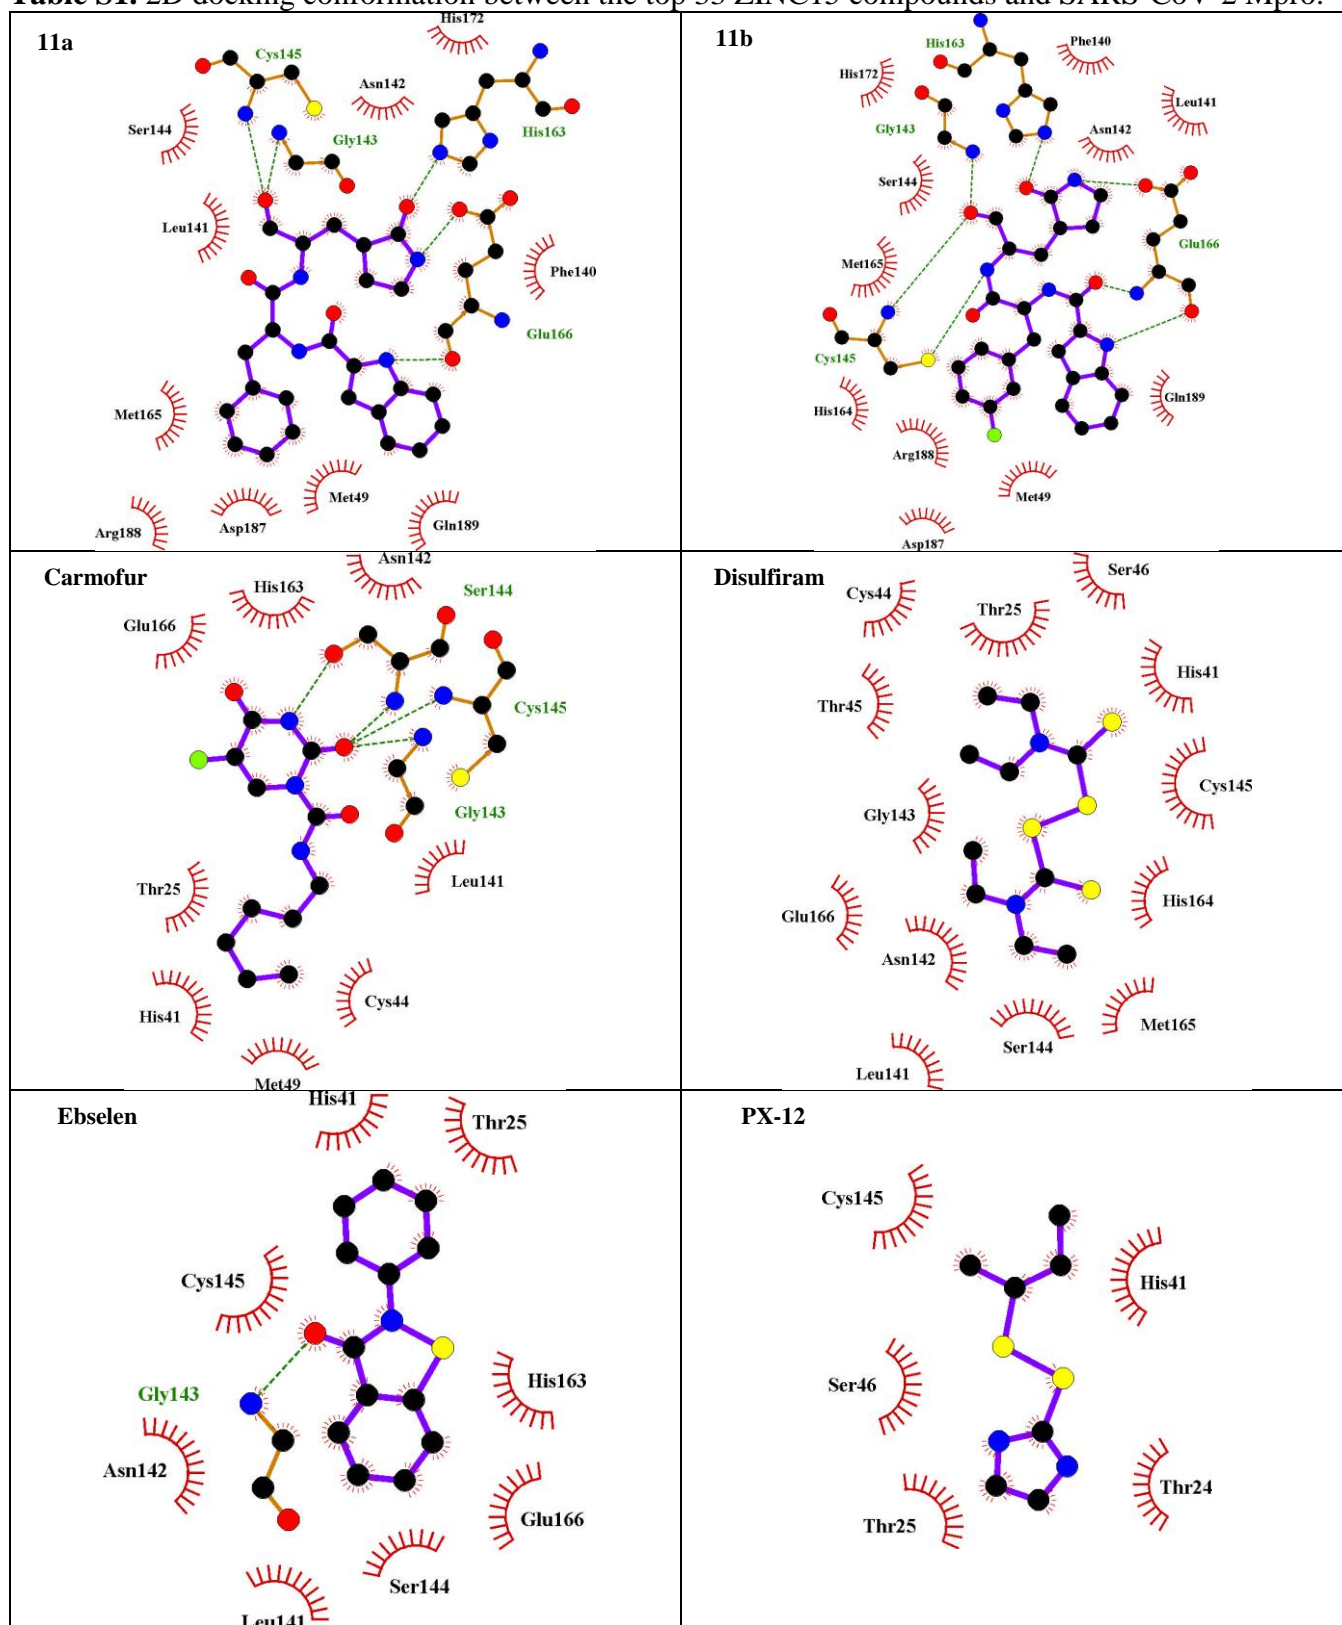

Shikonin

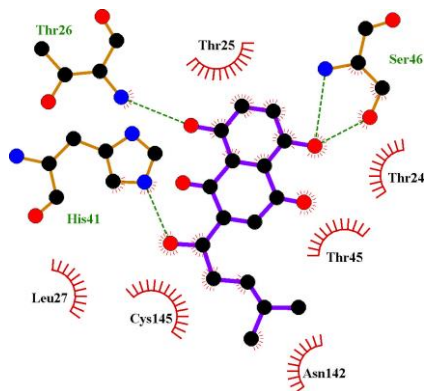

Tideglusib

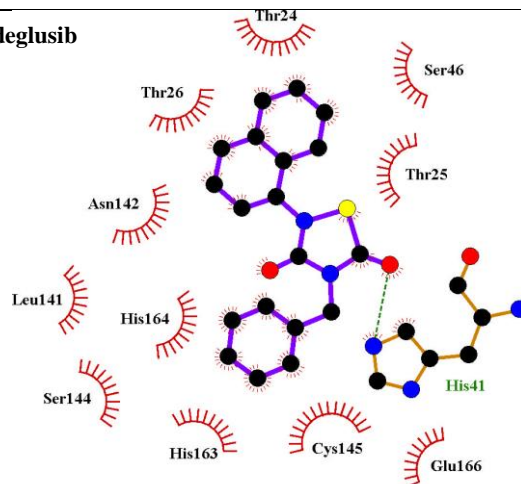

ZINC000169289767

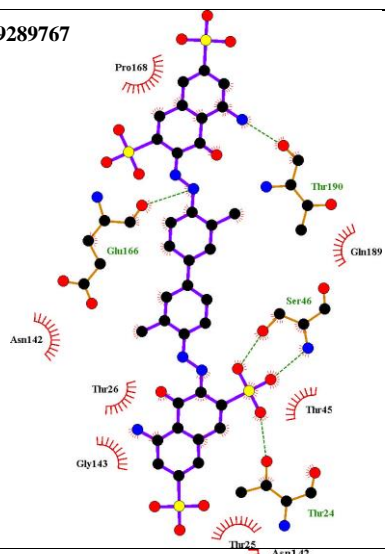

ZINC000100067477

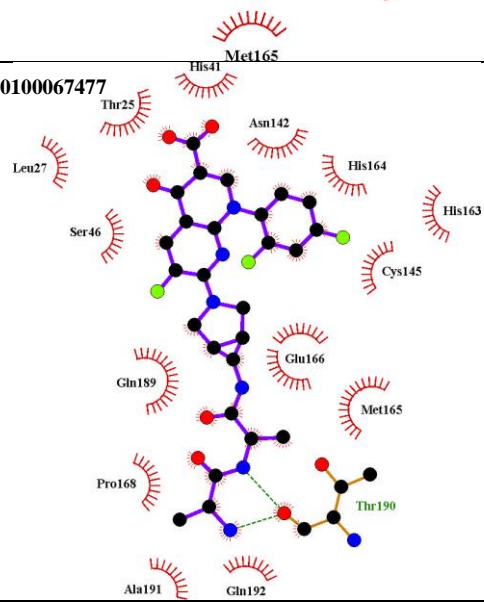

ZINC000004215257

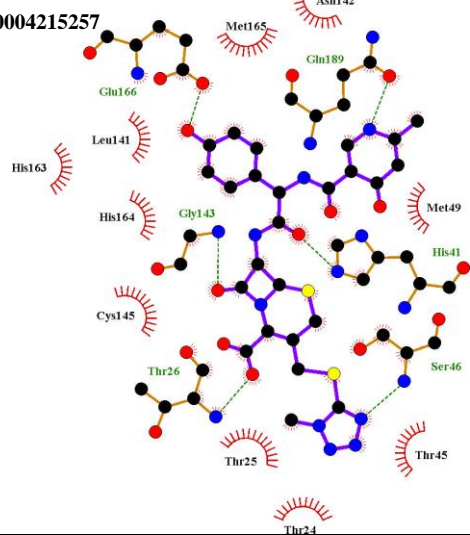

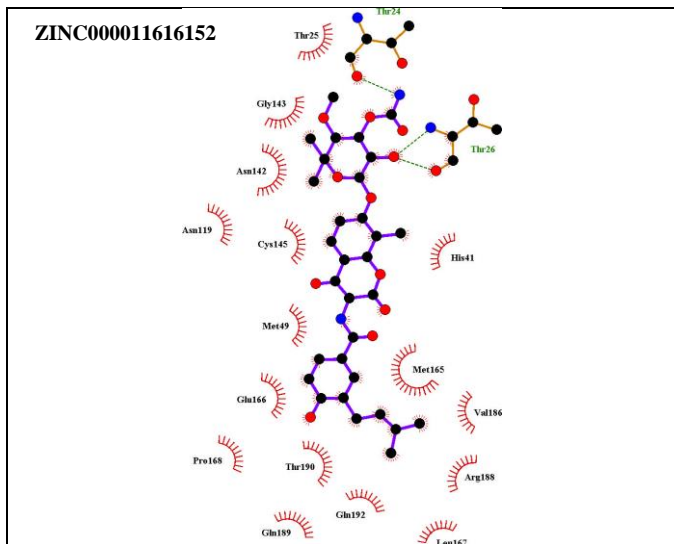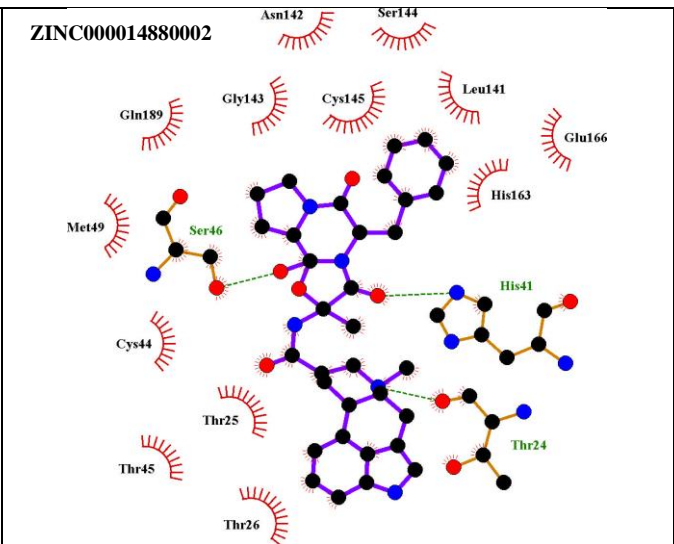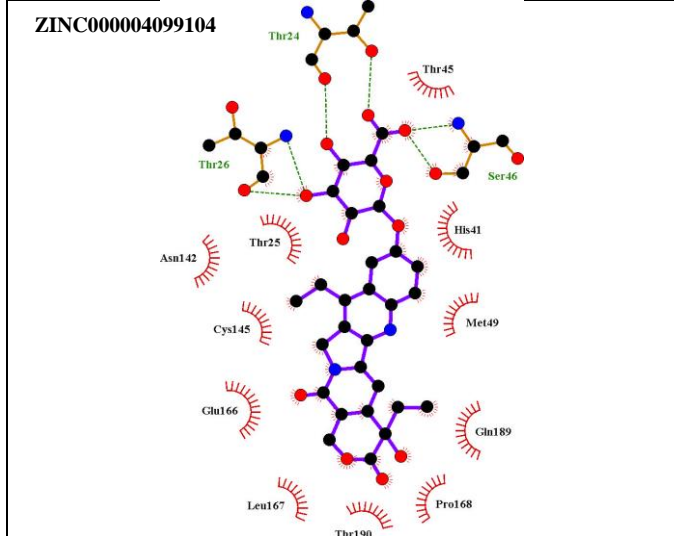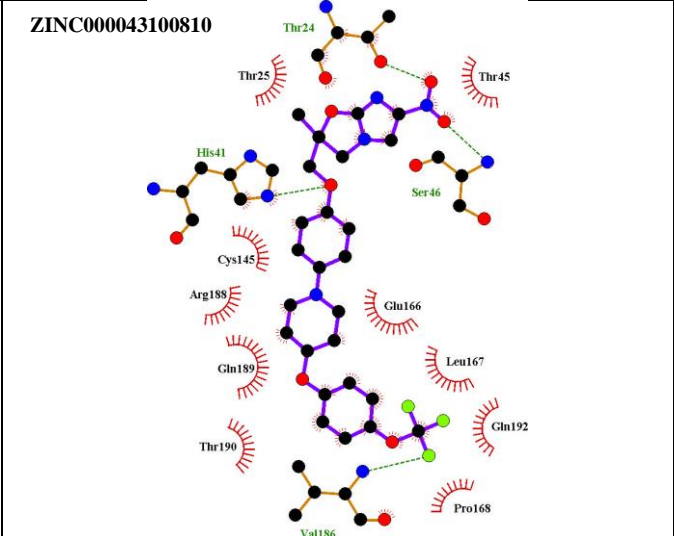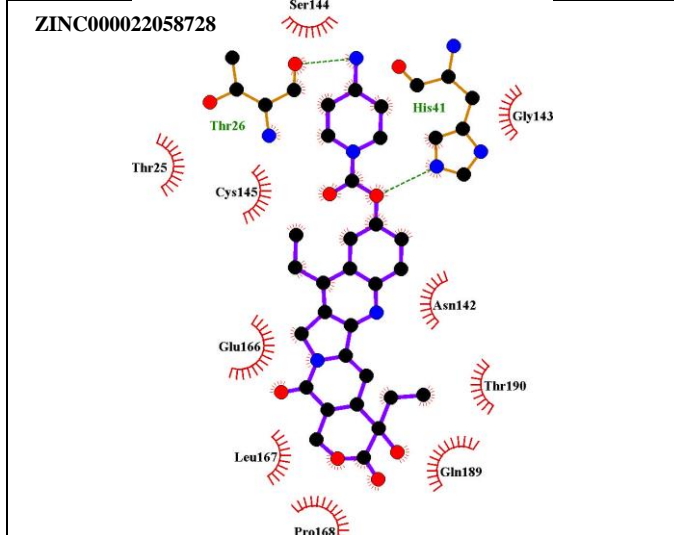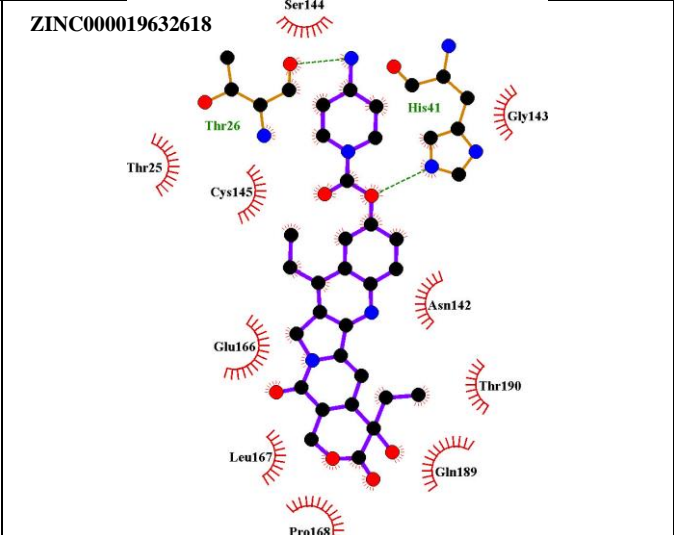

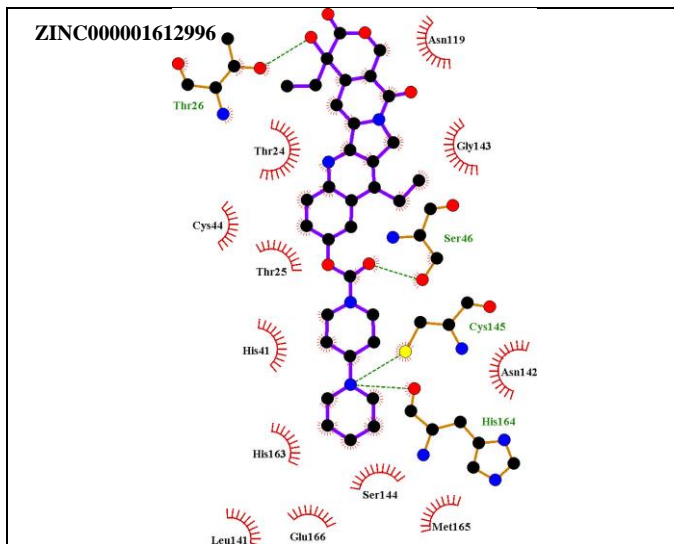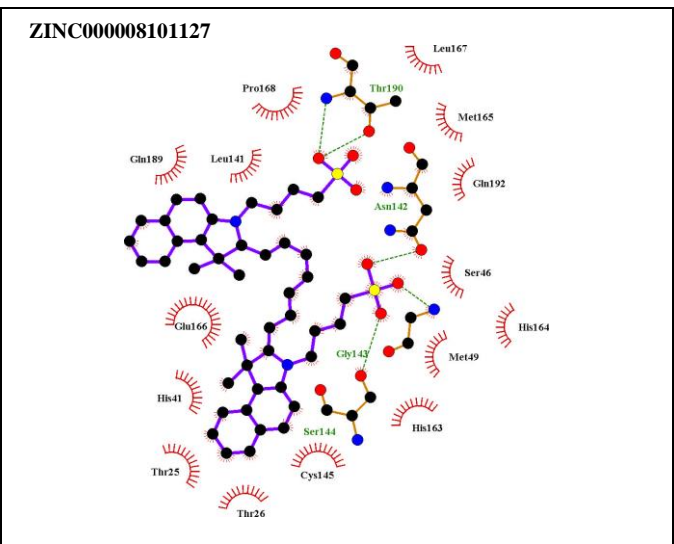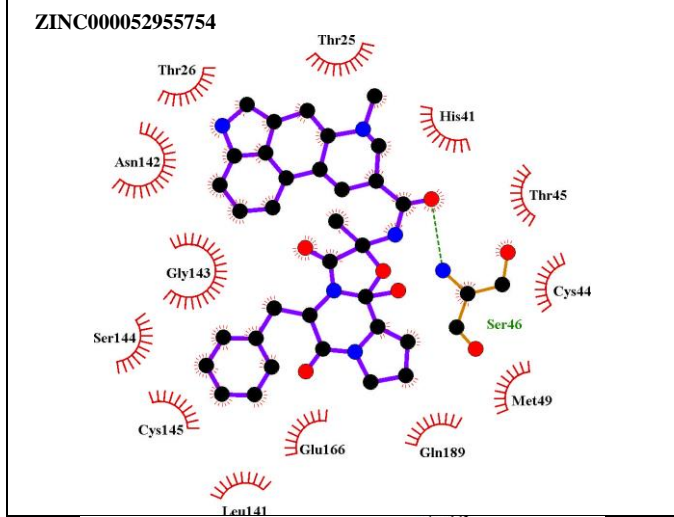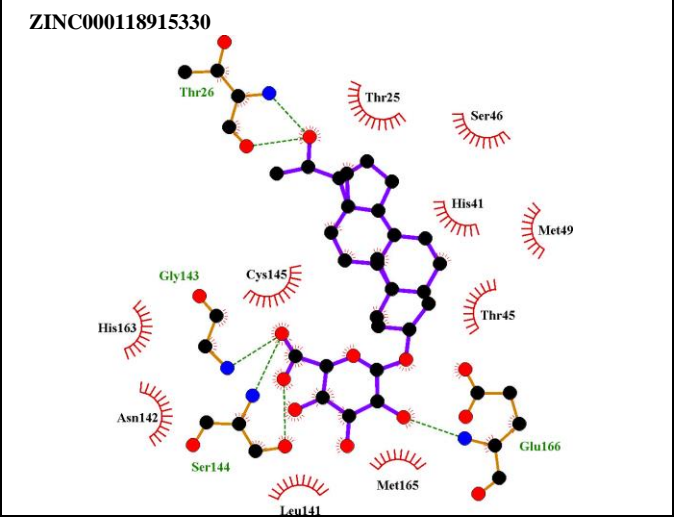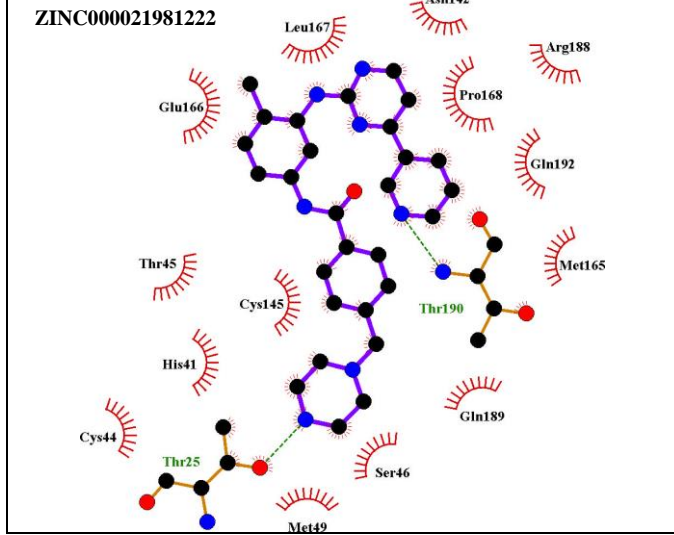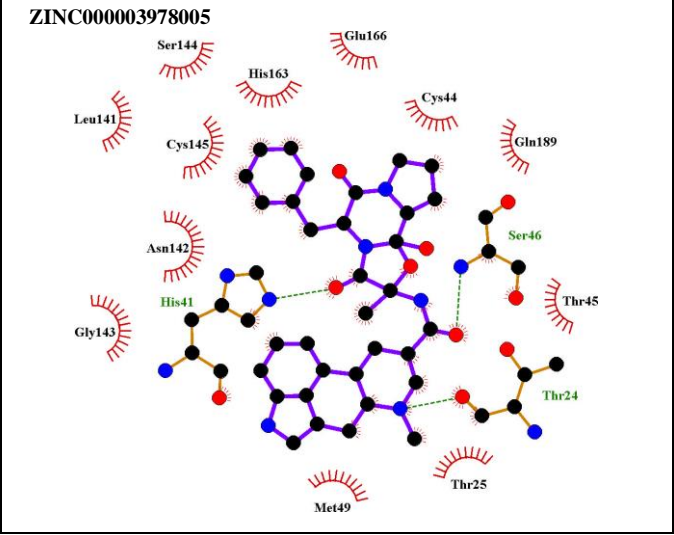

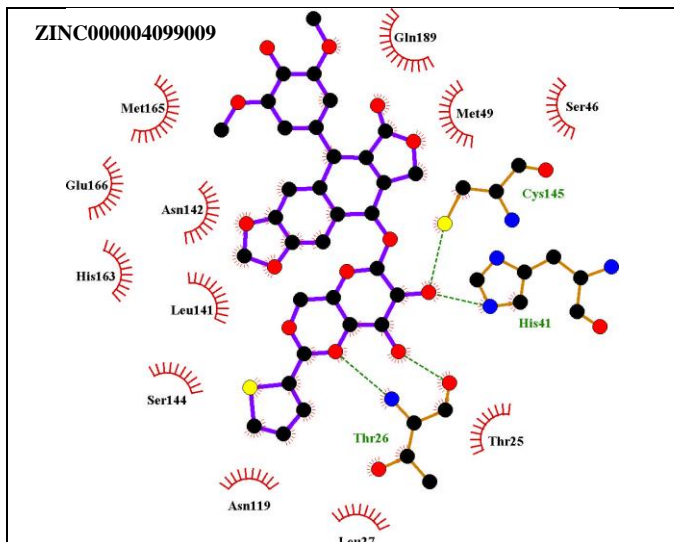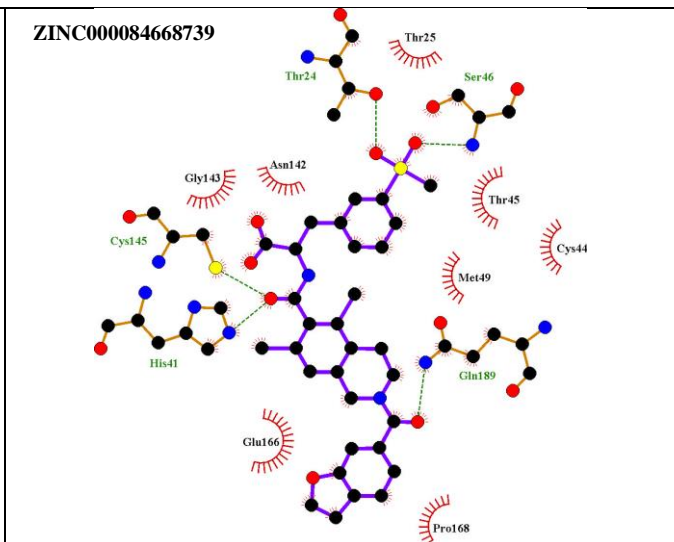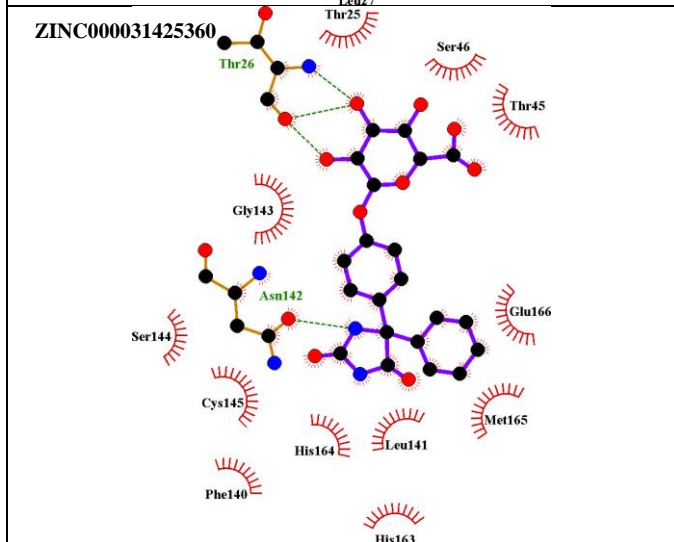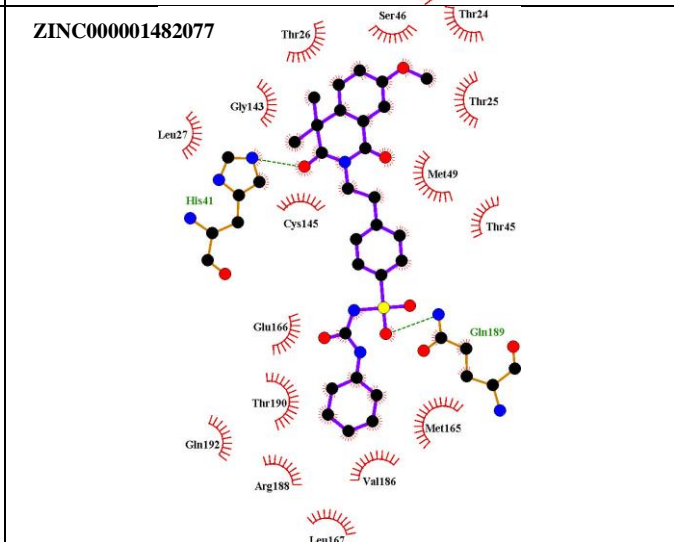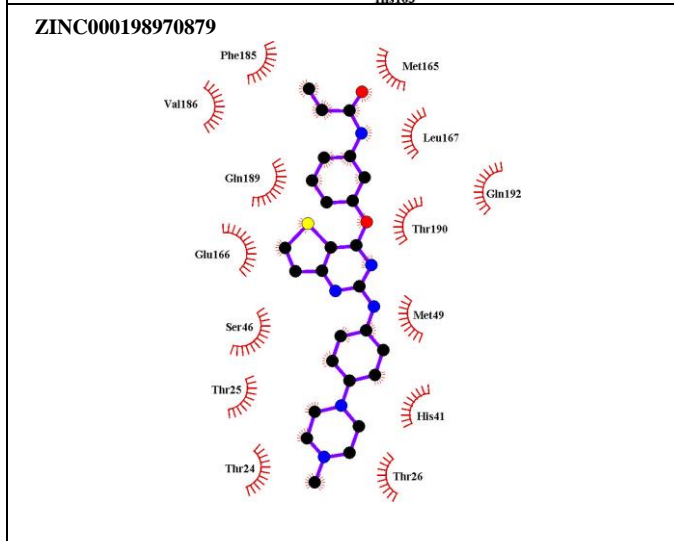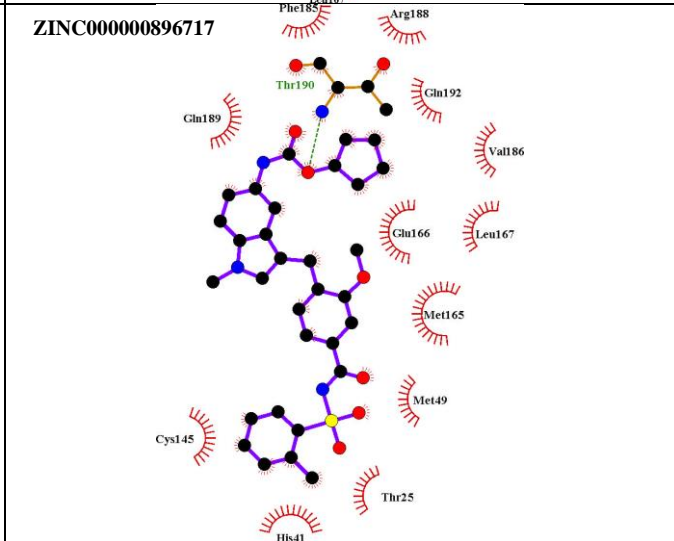

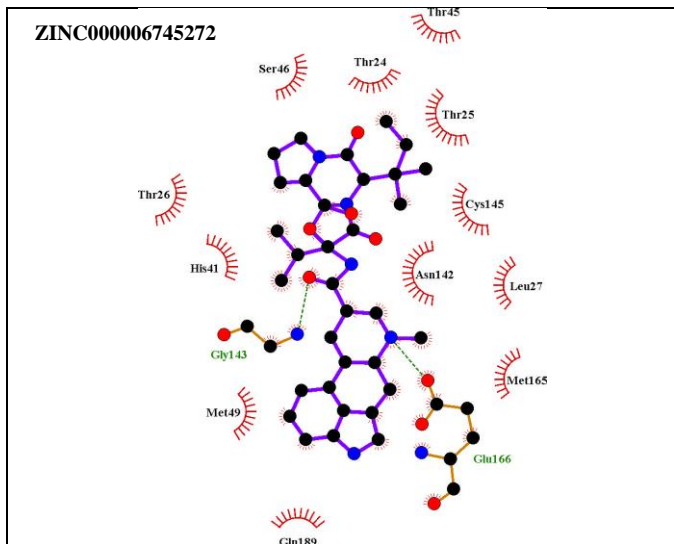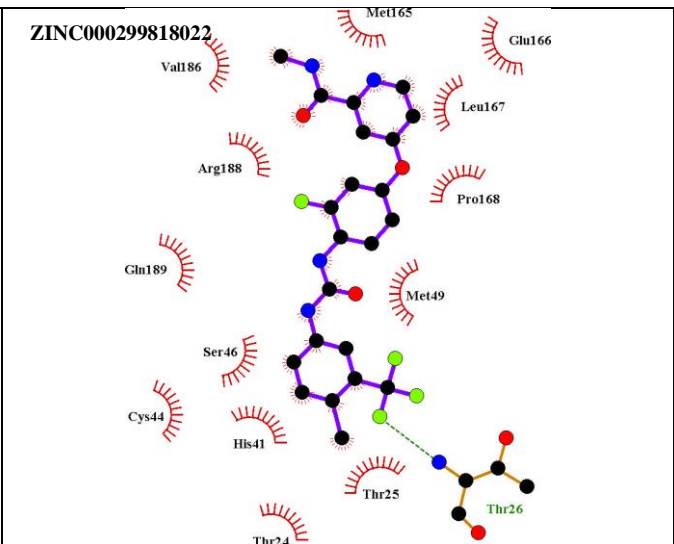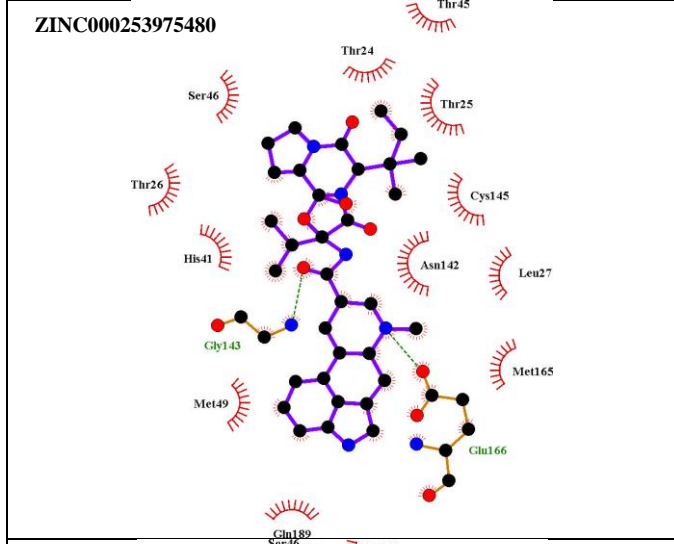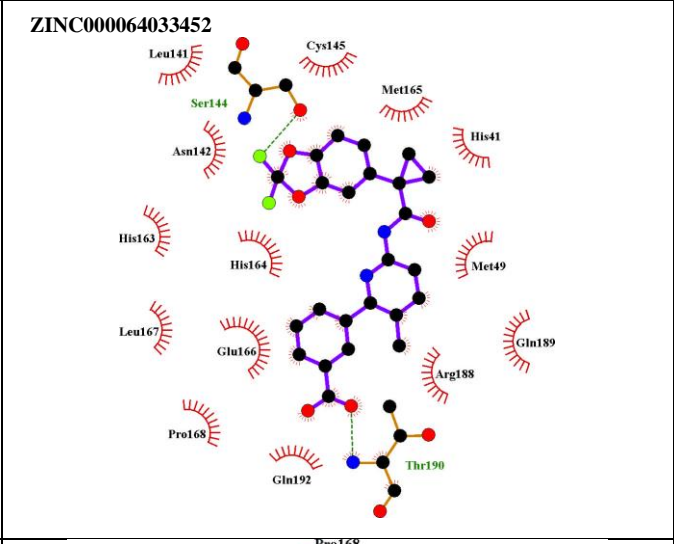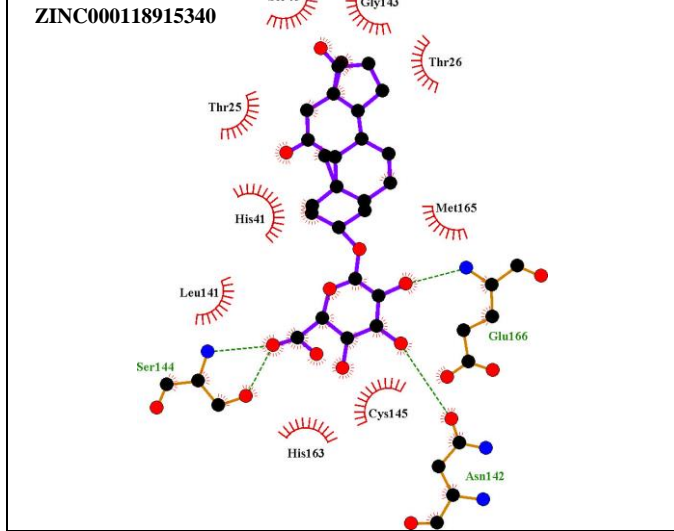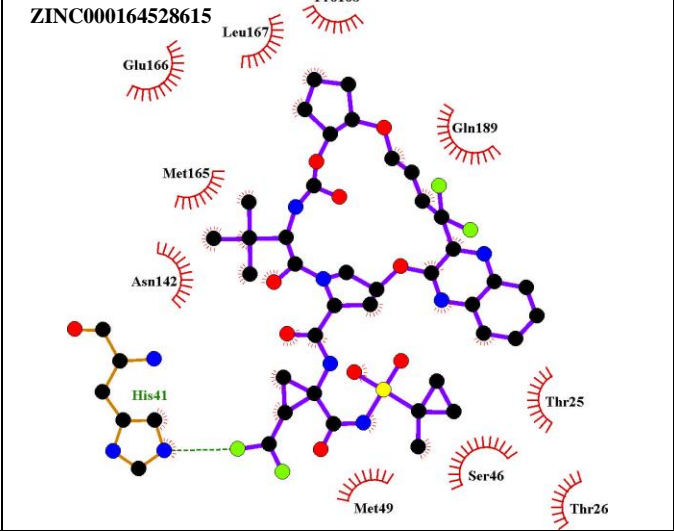

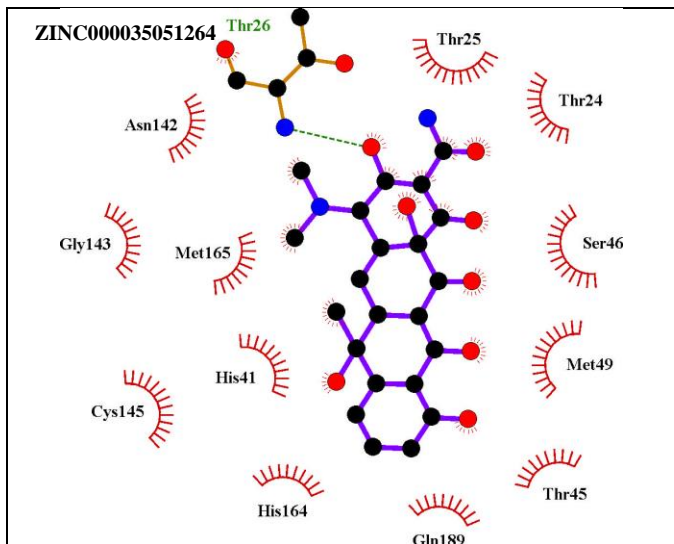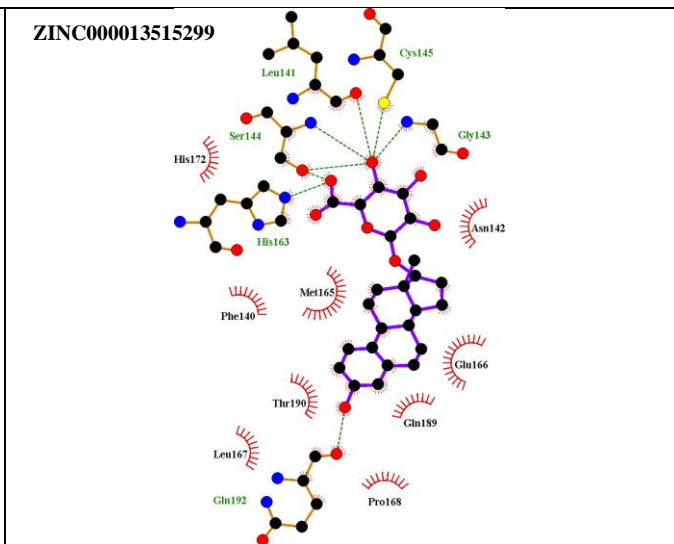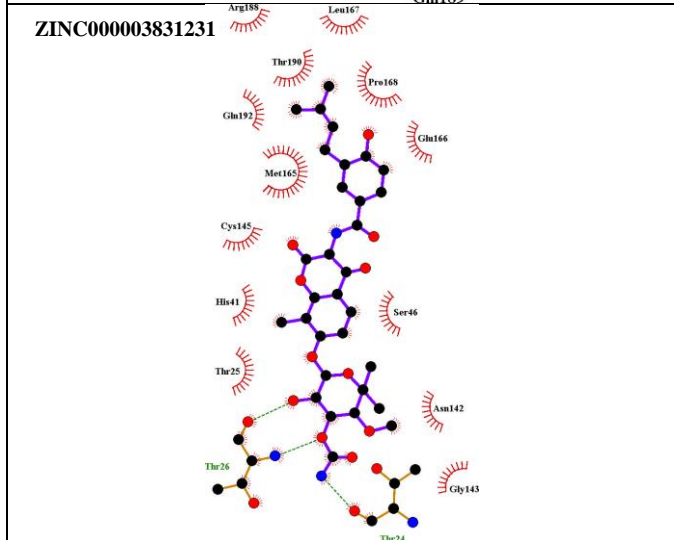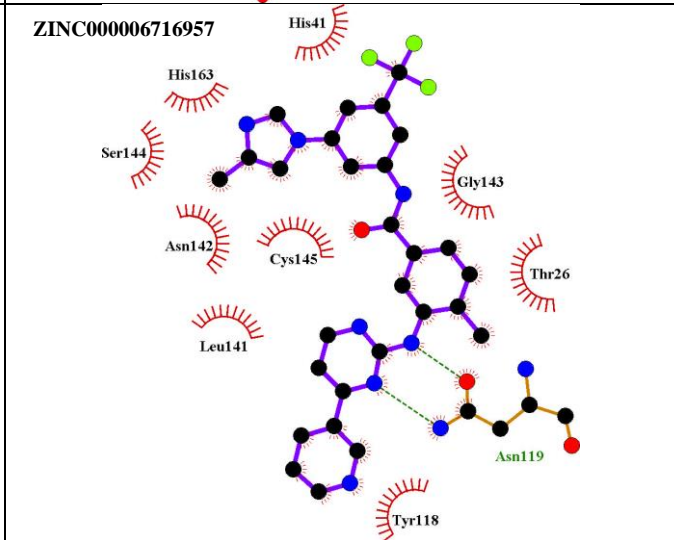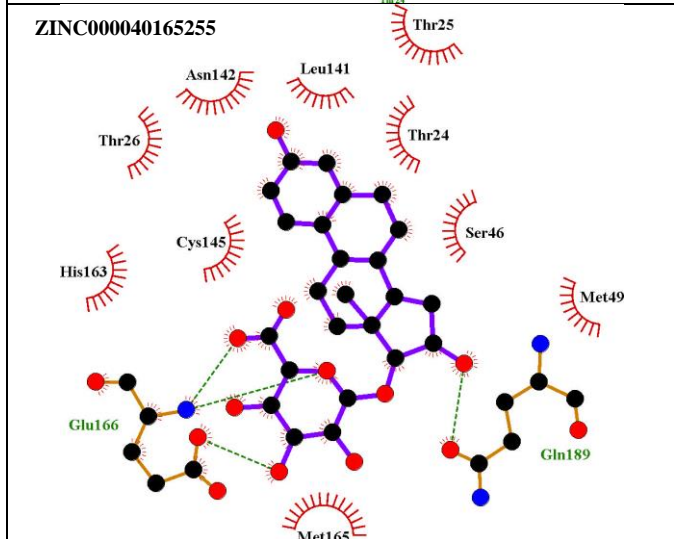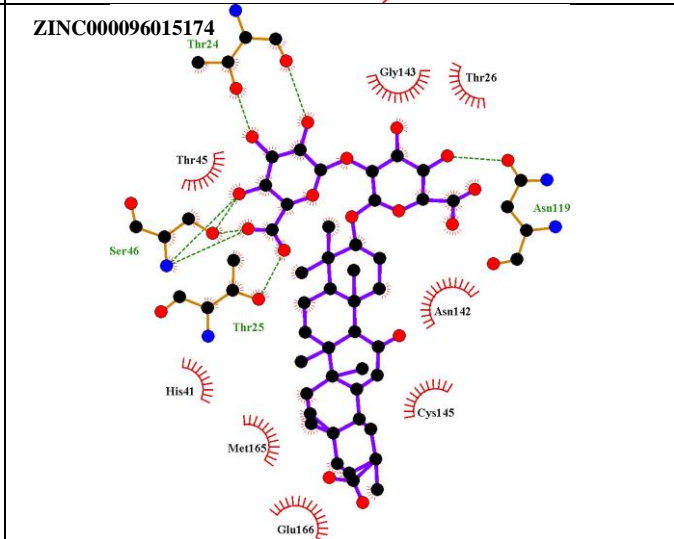



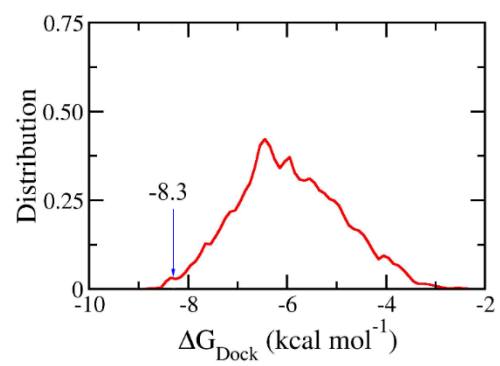

**Figure S1.** Distribution of docking energy between 6363 ZINC15 compounds and SARS-CoV-2 Mpro.

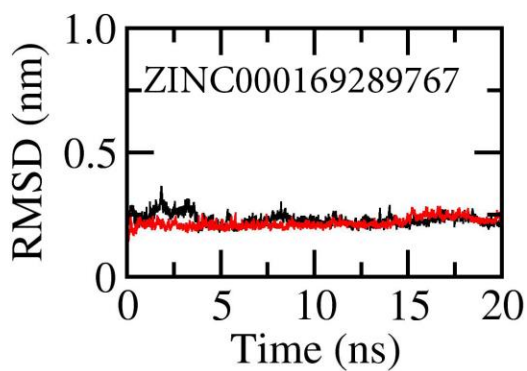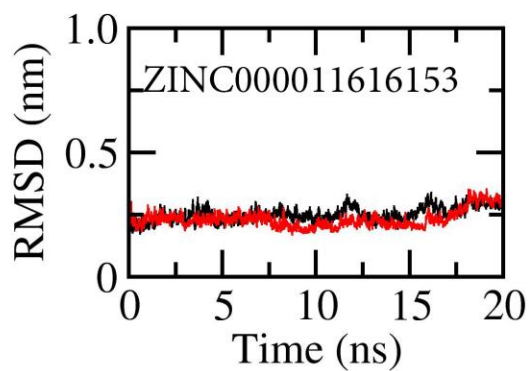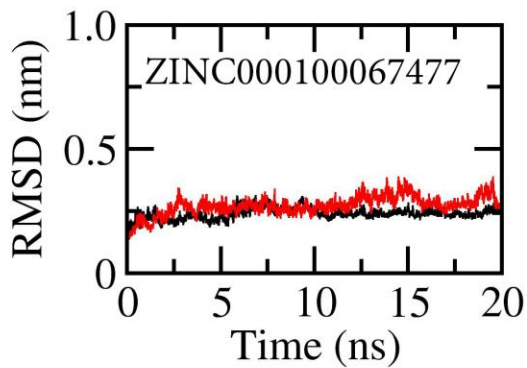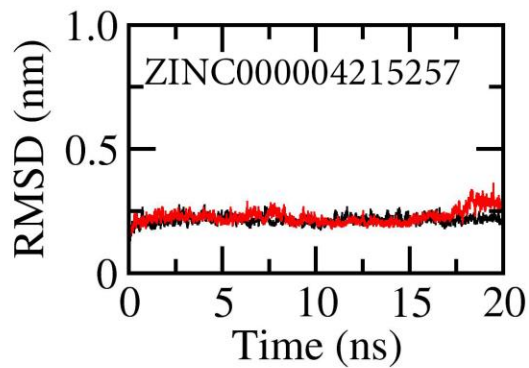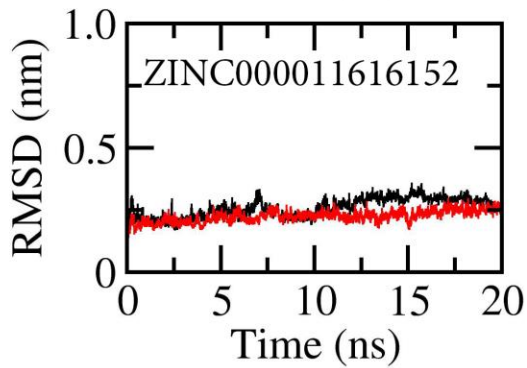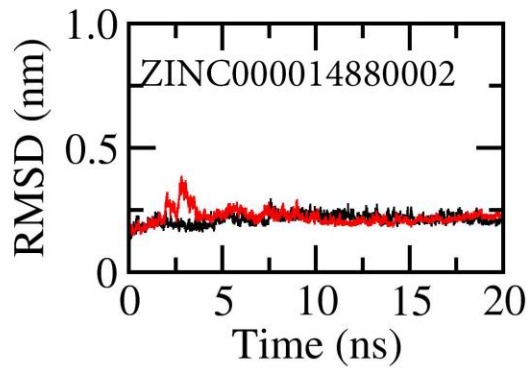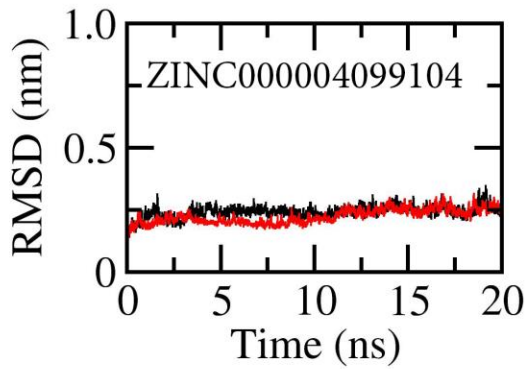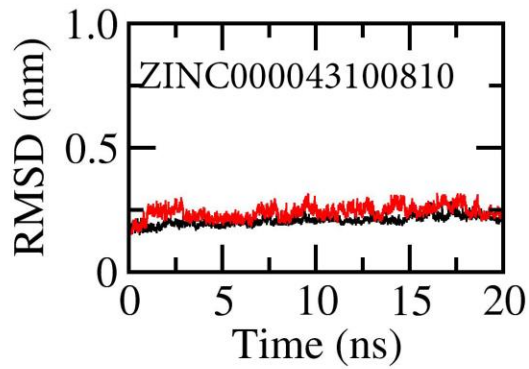

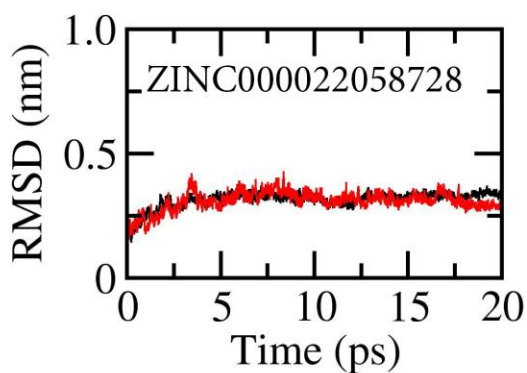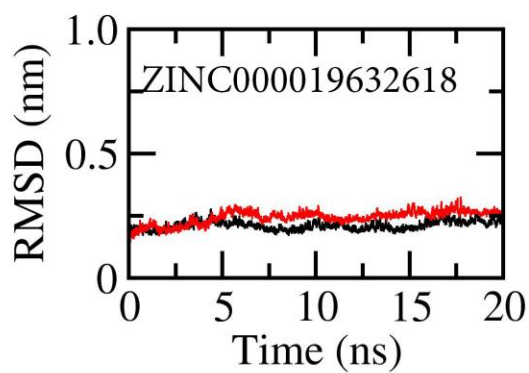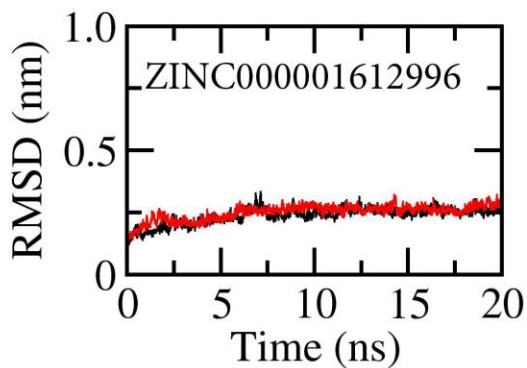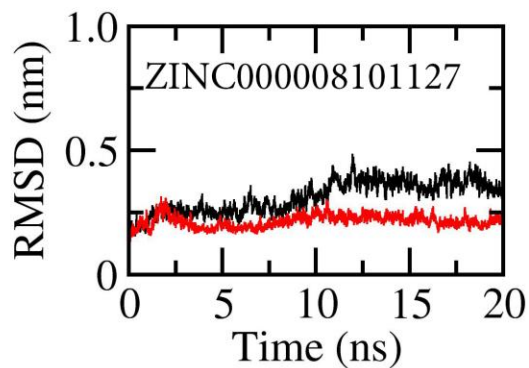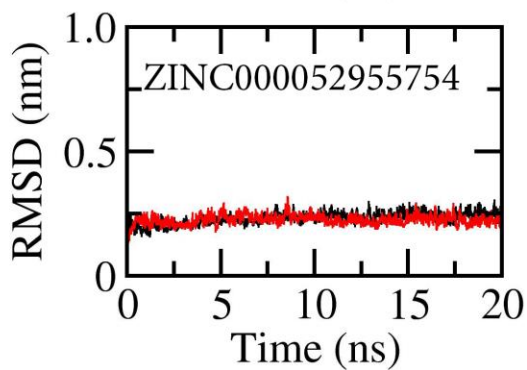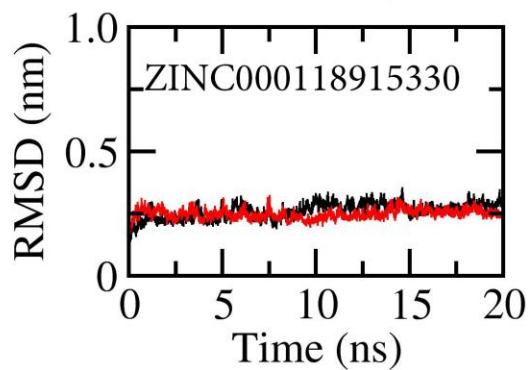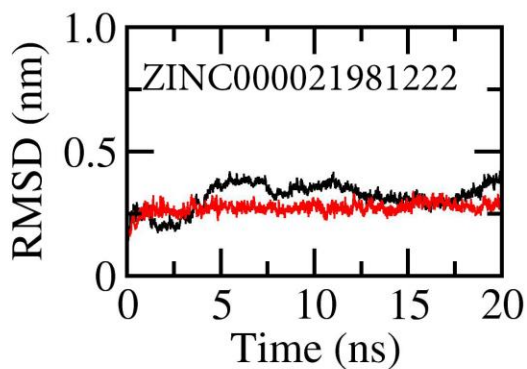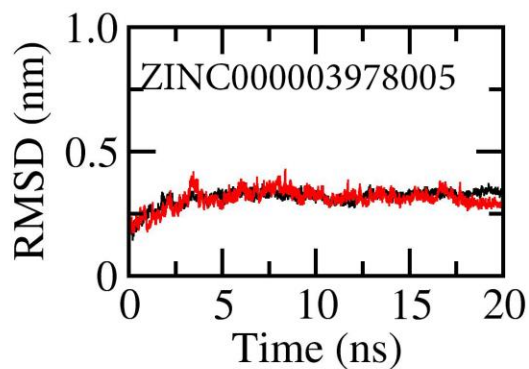

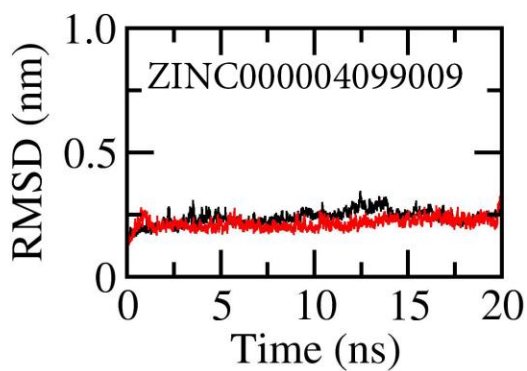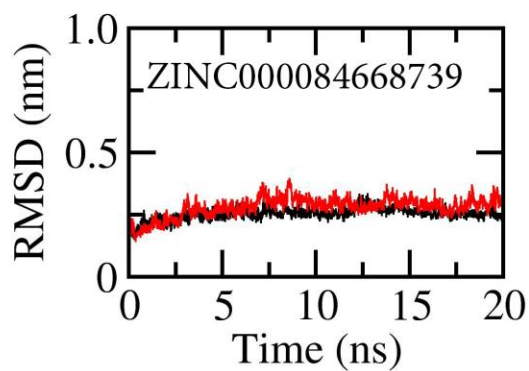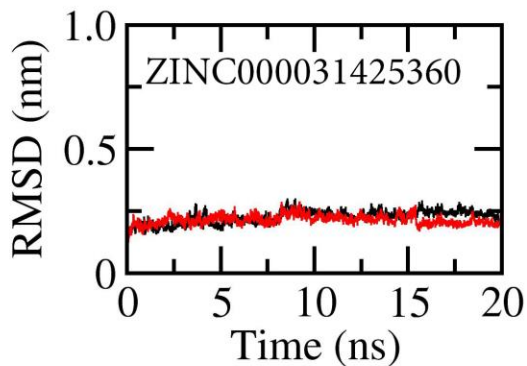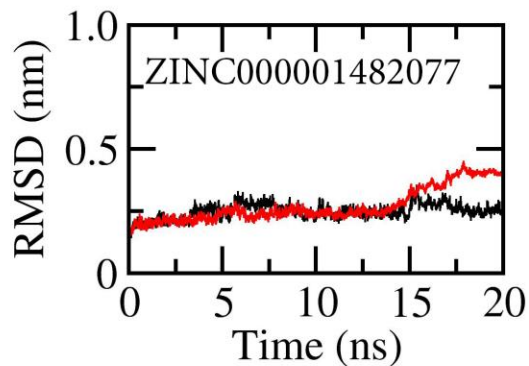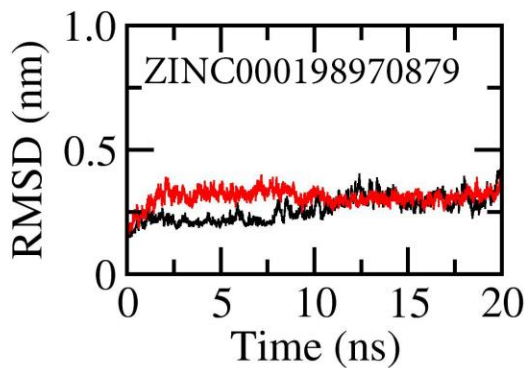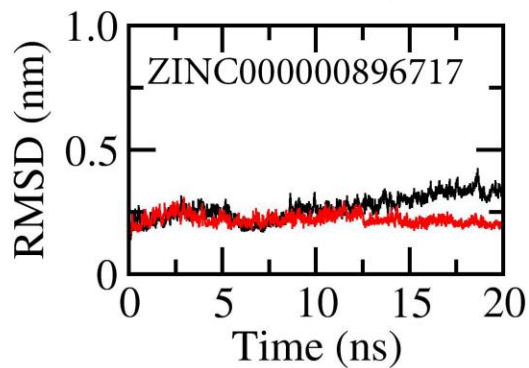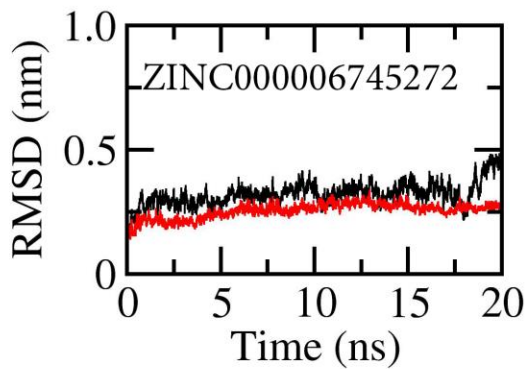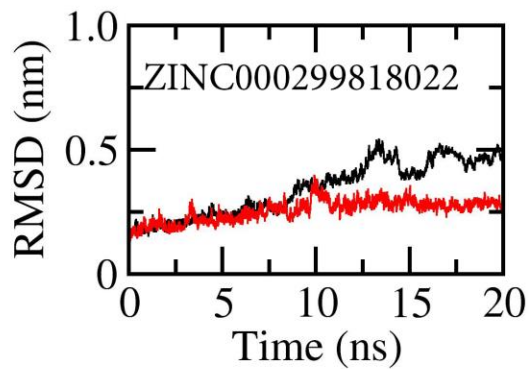

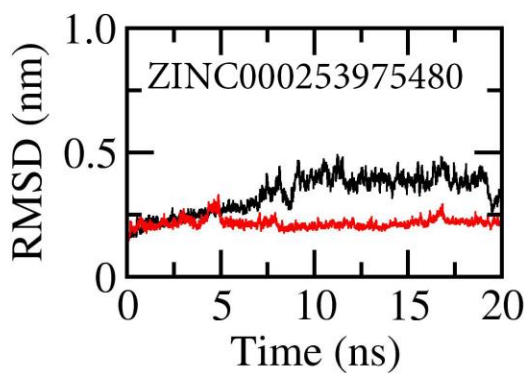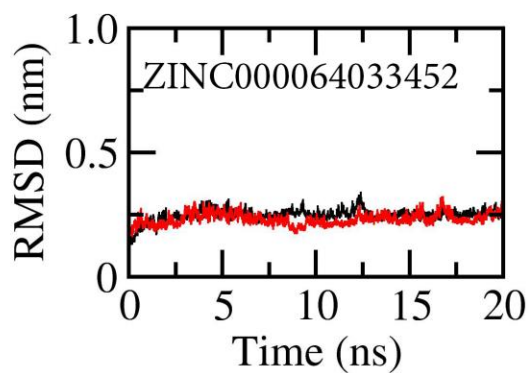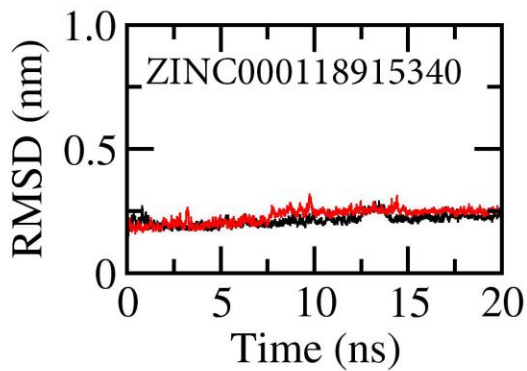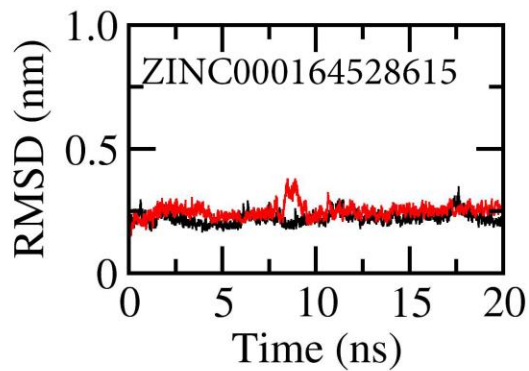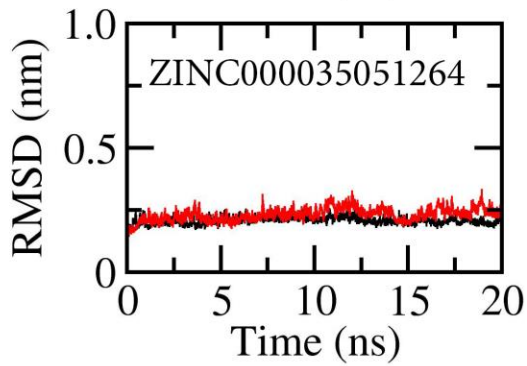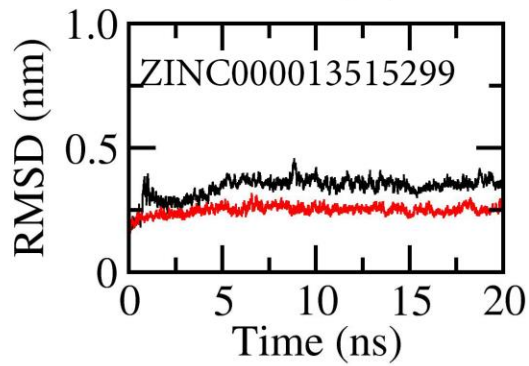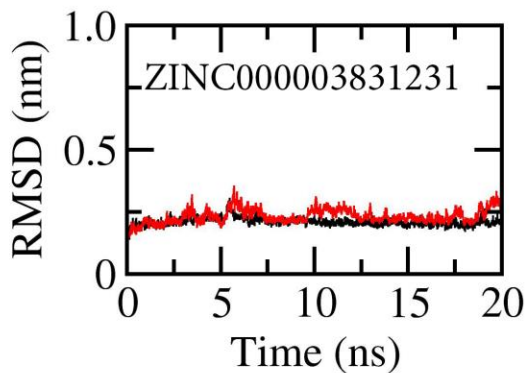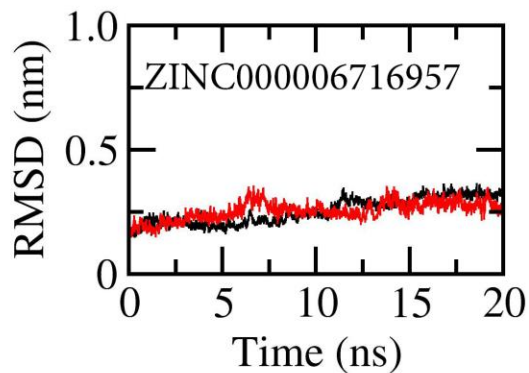

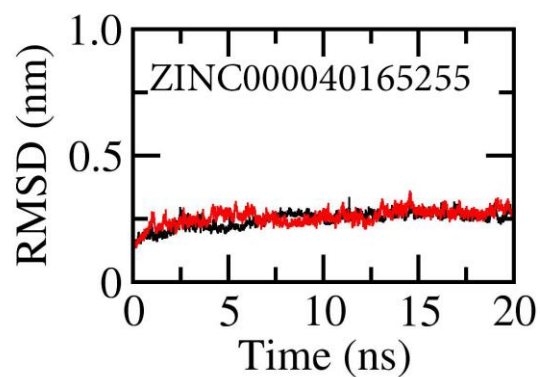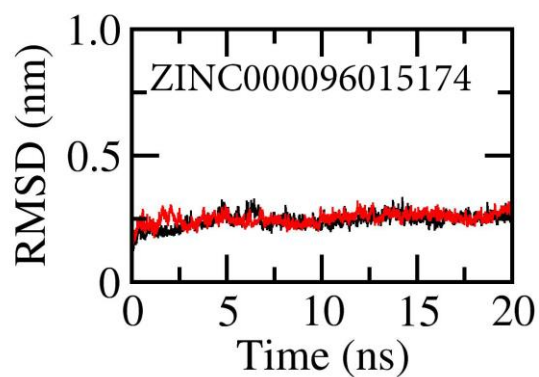

**Figure S2.** All-atom RMSD of SARS-CoV-2 Mpro+inhibitors complexes during two independent 20ns-long MD simulations.

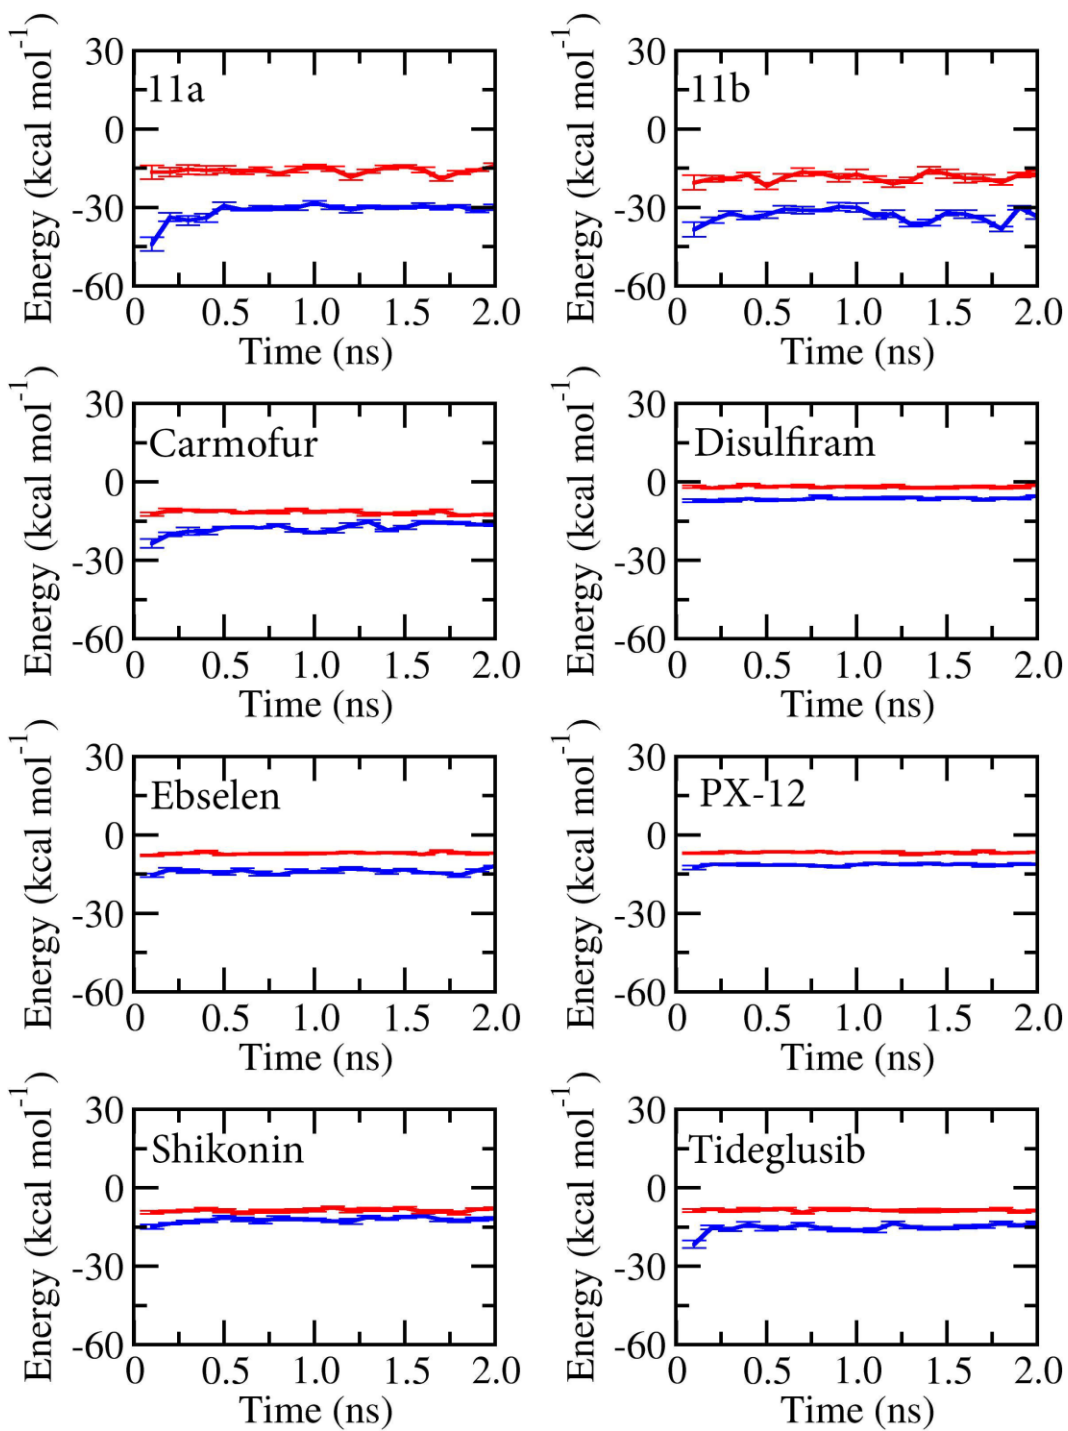

**Figure S3.** Desolvation free energy of experimentally characterized inhibitors of SARS-CoV-2 Mpro from solvated complex system (blue) and solvated ligand system (red). The difference between two metrics is the binding free energy between the ligand to SARS-CoV-2 Mpro, which obtained via FEP simulations.

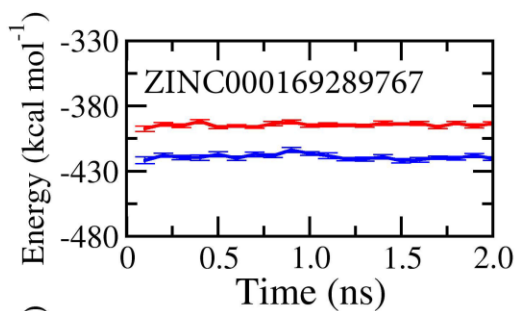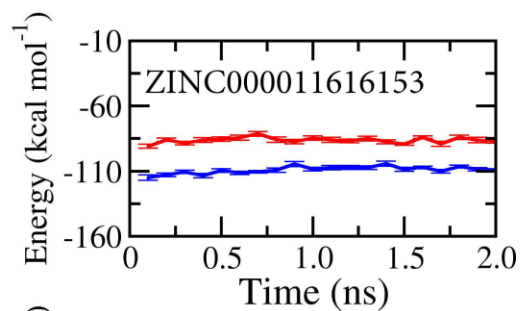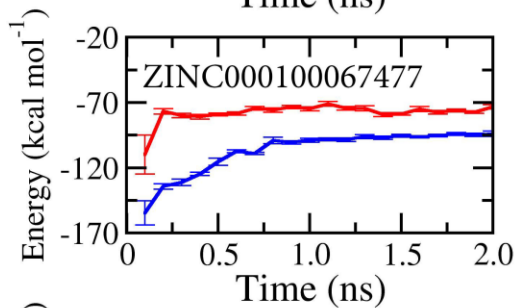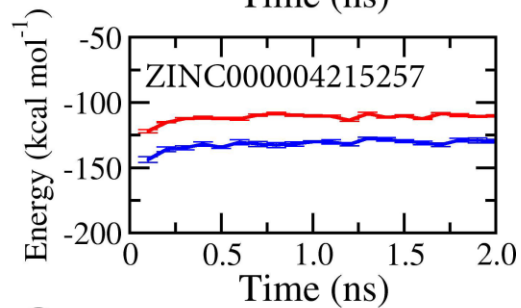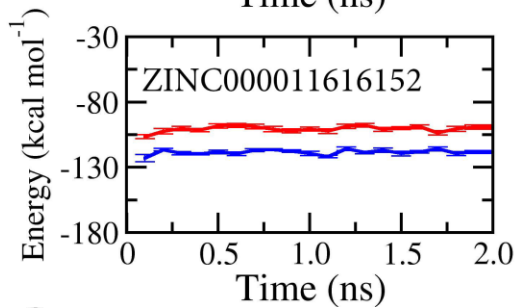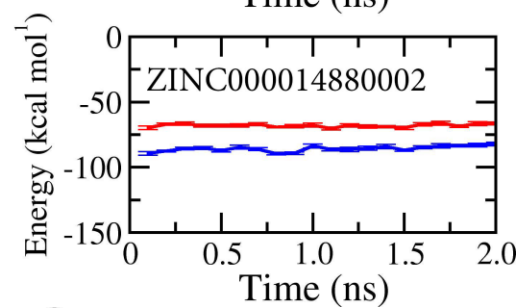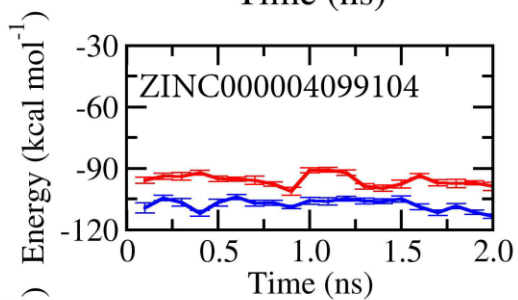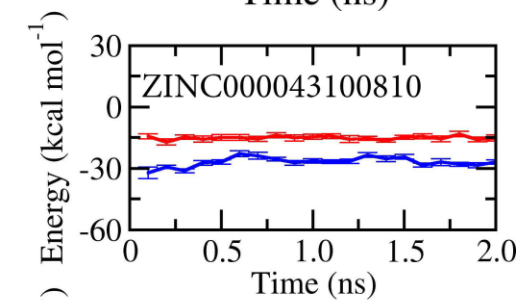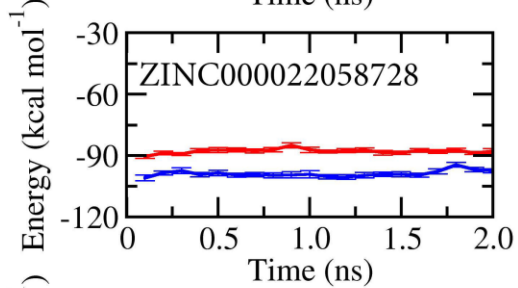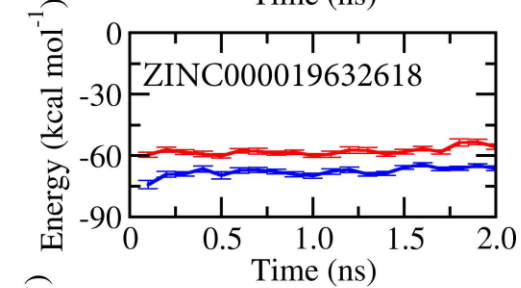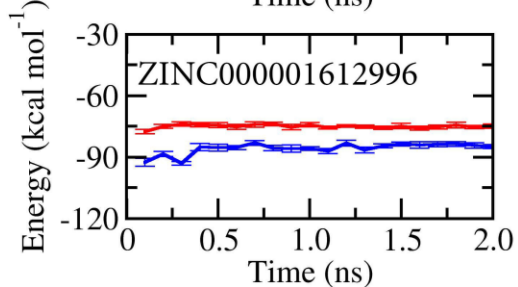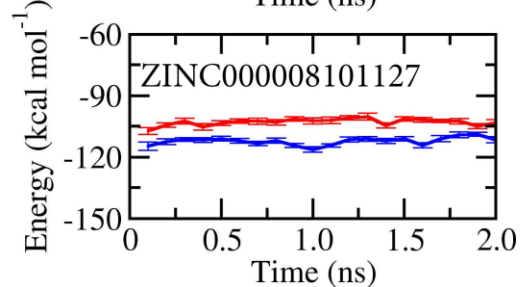



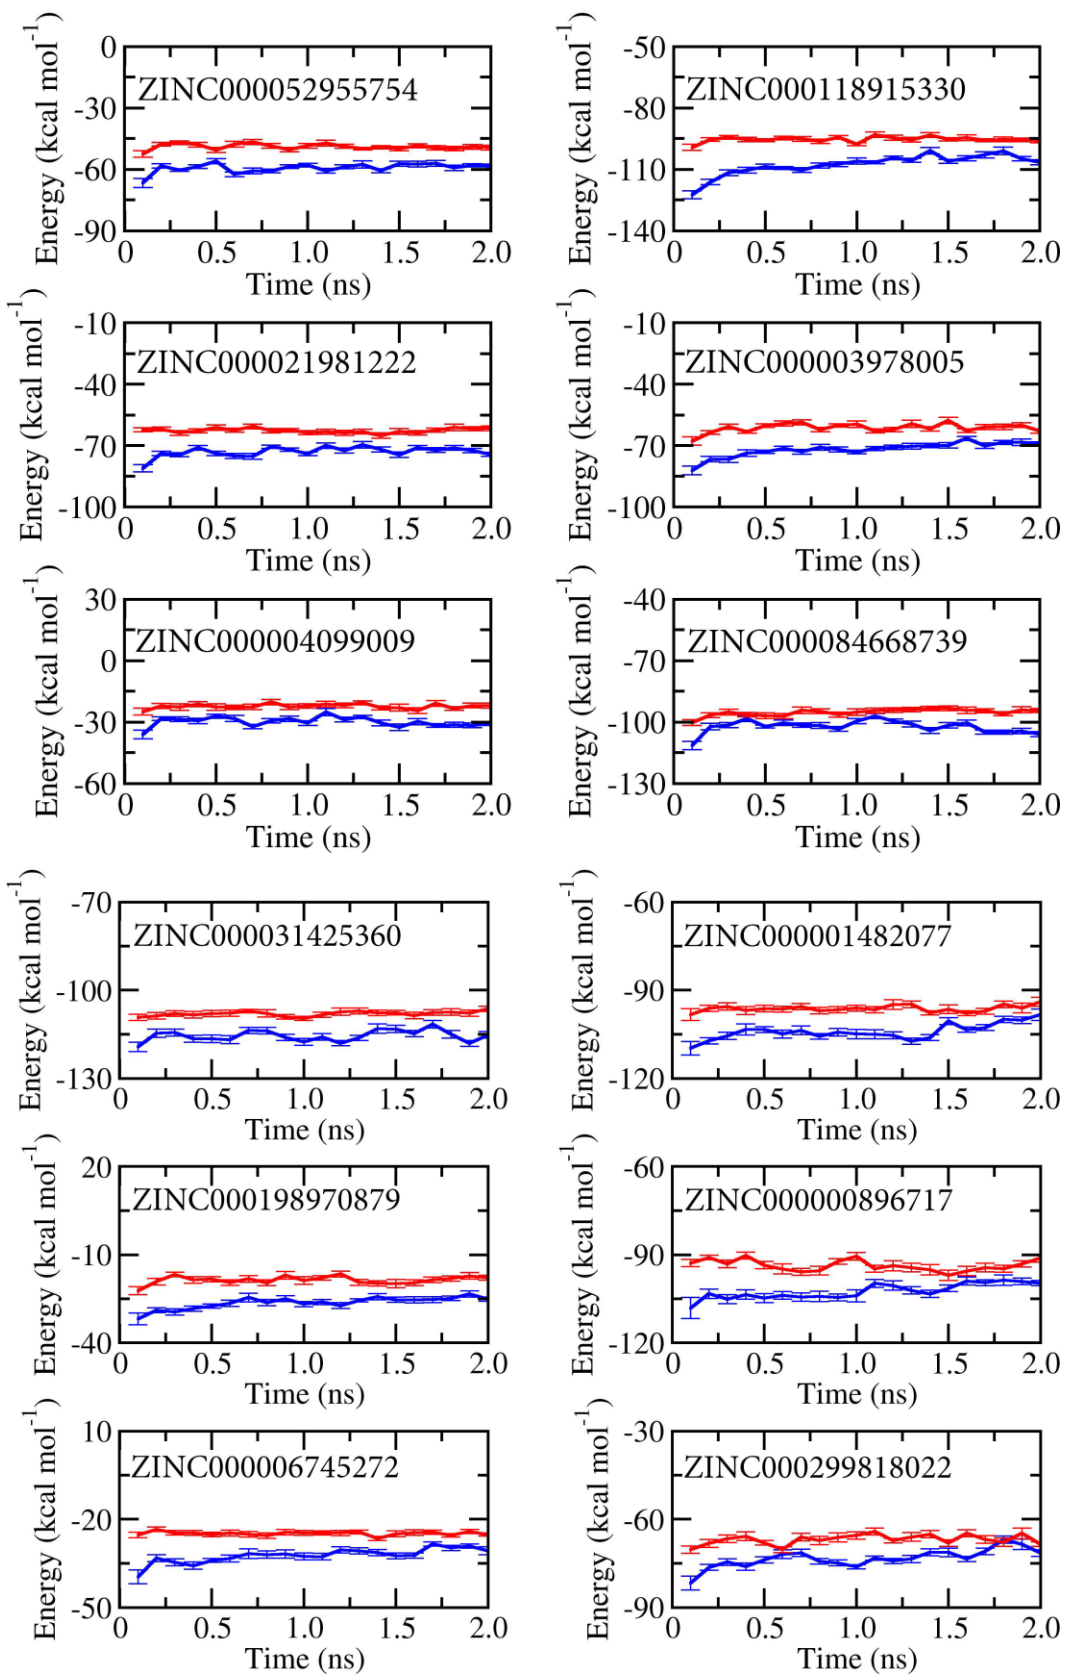

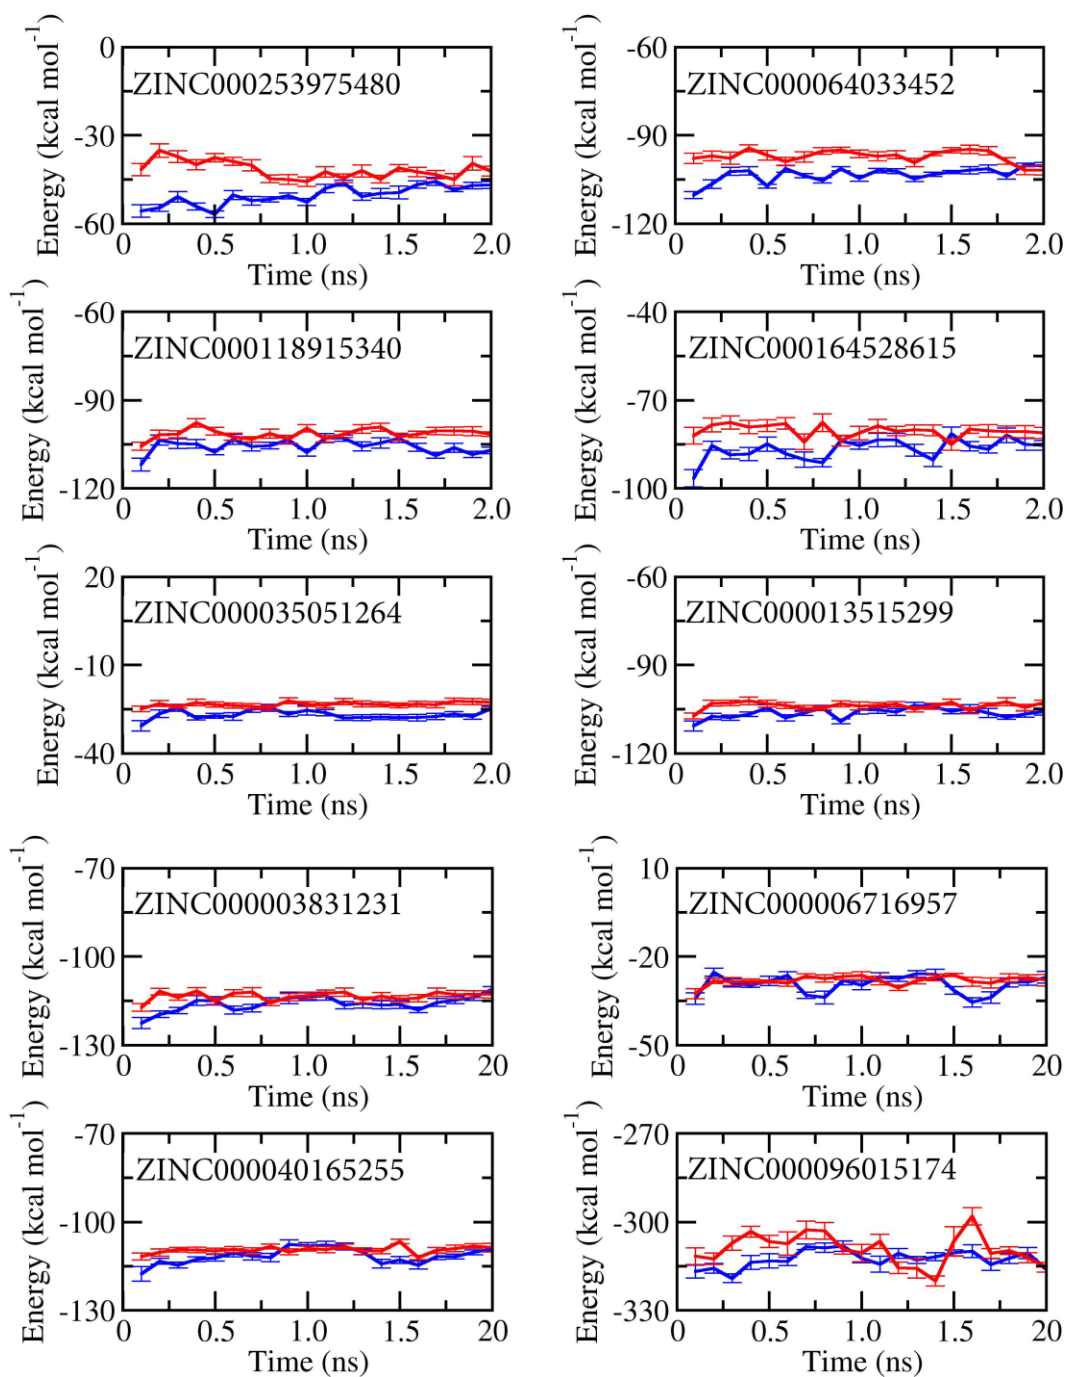

**Figure S4.** Desolvation free energy of the top 33 ZINC15 compounds of SARS-CoV-2 Mpro from solvated complex system (blue) and solvated ligand system (red). The difference between two metrics is the binding free energy between the ligand to SARS-CoV-2 Mpro, which obtained via FEP simulation.
